# Supplementary material for: Molecular Phylogeny and Morphology of Amphisphaeria (= Lepteutypa) (Amphisphaeriaceae)
Source: J Fungi (Basel). 2020 Sep 17;6(3):174. doi: 10.3390/jof6030174 (PMC7558453; doi:10.3390/jof6030174)
Supplement: Supplementary file 1 [file jof-06-00174-s001.pdf]

Supplementary material for

# Molecular Phylogeny and Morphology of *Amphisphaeria* (= *Lepteutypa*) (Amphisphaeriaceae)

Milan C. Samarakoon <sup>1,2,3,4,7</sup>, Sajeewa S. N. Maharachchikumbura <sup>4</sup>, Jian-Kui (Jack) Liu <sup>4</sup>, Kevin D. Hyde <sup>3,5</sup>, Itthayakorn Promputtha <sup>1,2,\*</sup> and Marc Stadler <sup>6\*</sup>

<sup>1</sup> Department of Biology, Faculty of Science, Chiang Mai University, Chiang Mai 50200, Thailand; samarakoon\_m@cmu.ac.th (M.C.S.)

<sup>2</sup> Research Center in Bioresources for Agriculture, Industry and Medicine, Chiang Mai University, Chiang Mai 50200, Thailand; itthayakorn.p@cmu.ac.th (I.P.)

<sup>3</sup> Center of Excellence in Fungal Research, Mae Fah Luang University, Chiang Rai 57100, Thailand; coe-fungal@mfu.ac.th

<sup>4</sup> School of Life Science and Technology, University of Electronic Science and Technology of China, Chengdu 611731, P.R. China

<sup>5</sup> Innovative Institute of Plant Health, Zhongkai University of Agriculture and Engineering, Haizhu District, Guangzhou 510225, P.R. China

<sup>6</sup> Department of Microbial Drugs, Helmholtz-Zentrum für Infektionsforschung GmbH, Inhoffenstrasse 7, 38124 Brunswick, Germany

<sup>7</sup> Graduate School, Chiang Mai University, Chiang Mai, 50200, Thailand

\* Correspondence: itthayakorn.p@cmu.ac.th (I.P.); marc.stadler@helmholtz-hzi.de (M.S.); Tel.: +66 833344392 (I.P.); +49-531-6181-4240 (M.S.)

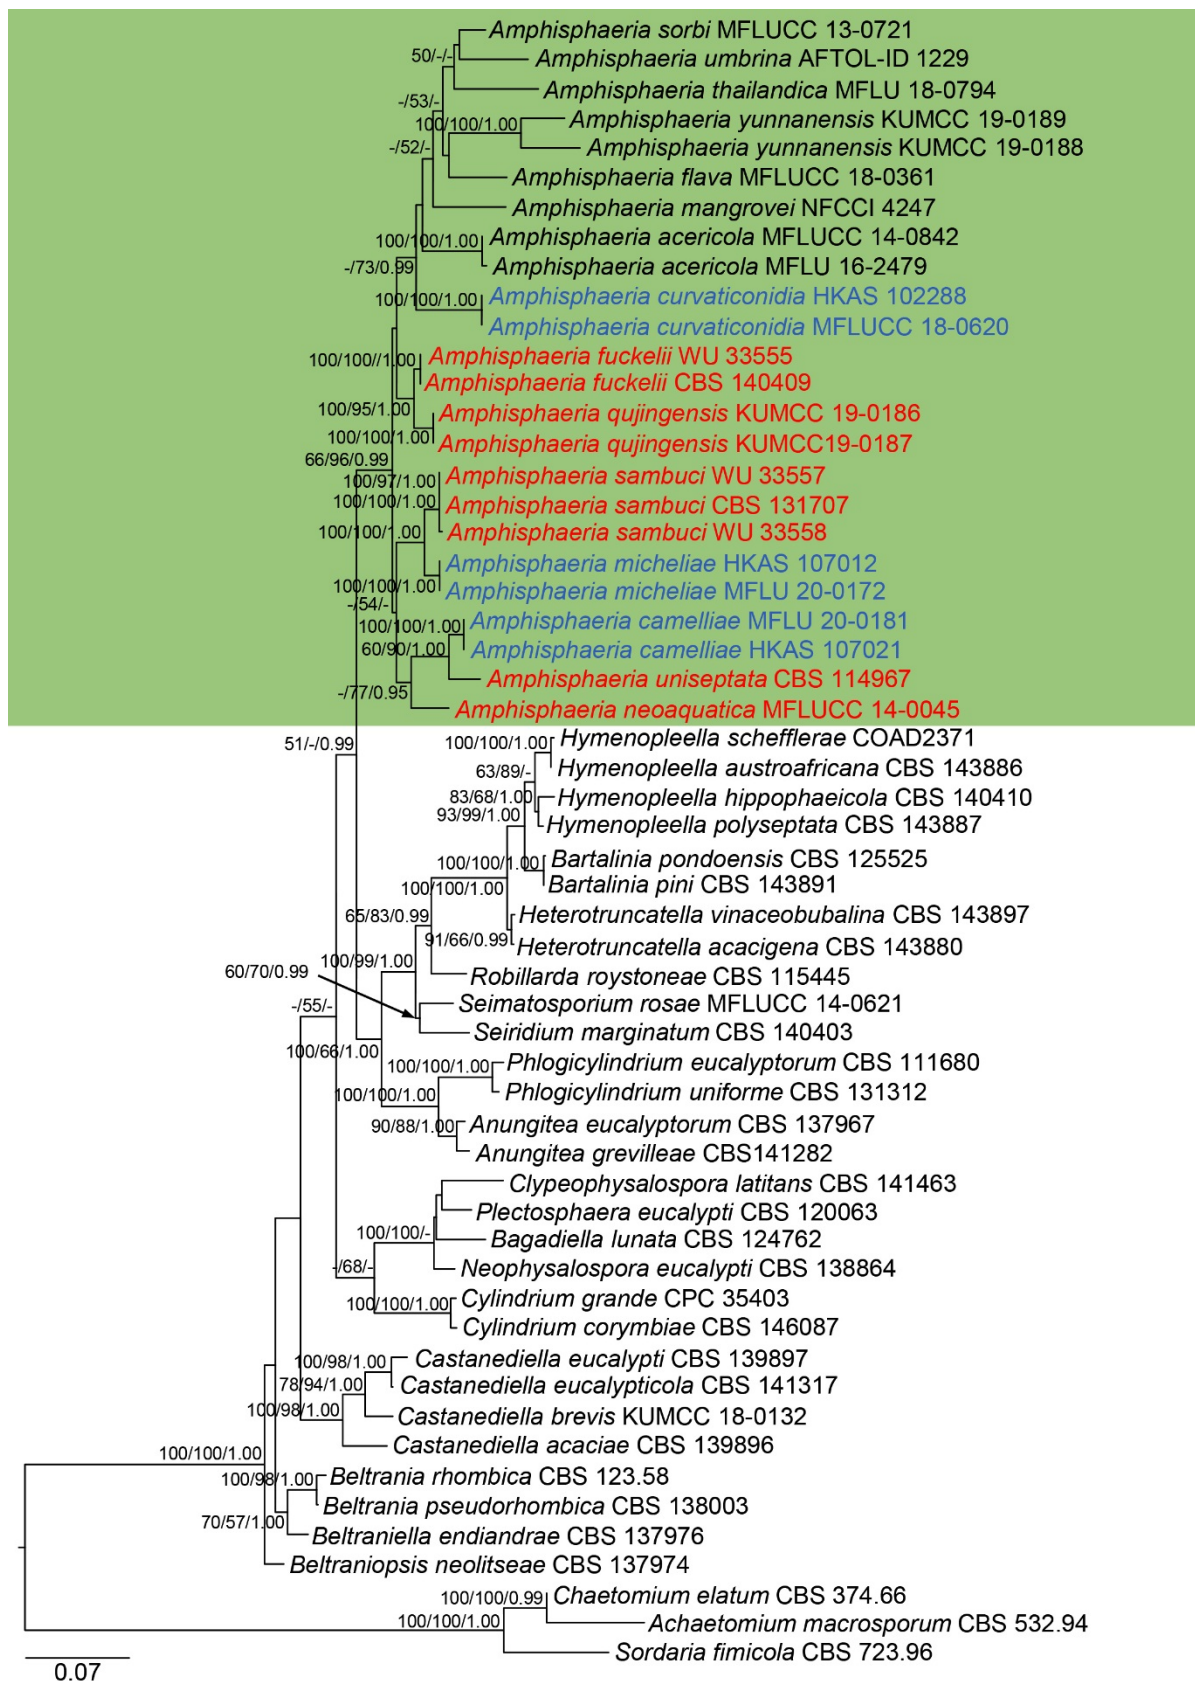

Figure S1. ML tree revealed by RAxML from an analysis of the LSU-ITS matrix of the Amphisphaeriaceae and selected families of Amphisphaeriales. Bootstrap supports ( $\geq 50\%$ ) of MP and ML and the posterior probability values ( $\geq 0.9$ ) of BI analyses are

indicated above or below the respective branches. Newly generated sequences are in blue and type strains are in bold. The tree is rooted to *Achaetomium macrosporum*, *Chaetomium elatum* and *Sordaria fimicola* (Sordariales). The scale bar represents the expected number of nucleotide substitutions per site. Novel combinations are in red. Newly introduced taxa are in blue.
